# Supplementary material
Source: PubMed Central journal article supplement (PMC2946412)

## Supplementary Materials

### Figure Legends

**Figure 1.** Several OCLN isoforms are expressed in Huh7.5.1 cells. Endogenous OCLN was detected by immunoblotting using a Zymed polyclonal antibody. Whereas there were at least four distinct bands found in Huh7.5.1 lysates, only one prominent band was seen in lysates derived from Caco-2 cells, corresponding to the predicted ~62kd OCLN. Another very weak band (~25kd) was also found in lysates derived from Caco-2 cells.

**Figure 2.** OCLN deletants do not have dominant negative effects on HCVpp entry into Huh7.5.1 cells. Cells were transduced with lentivirus expressing indicated OCLN deletants, followed by Bald virus or HCVpp infection.

**Figure 3.** Shortened Dynasore treatment inhibits HCV entry. Huh7.5.1 cells were pre-treated with Dynasore at indicated doses for two hours and then infected by HCVpp or HCVcc-luc for additional two hours. After infection, Dynasore was removed and cells were incubated for forty-eight hours prior to luciferase assay. Data are shown as mean  $\pm$  standard deviation.

**Figure 4.** Phase contrast images of PHHs cells. Live cell images were captured twice at different focal planes using the Nikon TS-100 microscope. Bile canaliculi structures were more evident in focal plane #2 as dark, widened gaps between cells.

**Figure 5.** OCLN does precipitate with CD81. 0.5 µg of full-length hOCLN or hCLDN1 was co-transfected with a 0.5 µg of Flag-hCD81 into 293T cells. 48 hours post-transfection, cell lysates were immunoprecipitated with an anti-Flag antibody. Immunoprecipitates as well as input lysates were blotted for CLDN1 and OCLN.

**Figure 6.** The endogenous level of OCLN in four different cell lines (786-O, BT-549, Huh7.5.1, and HT-29) was determined by immunoblotting. Images obtained after longer exposure reveal that 786-O cells express endogenous OCLN at a relatively low level.

# Supplementary Fig. 1

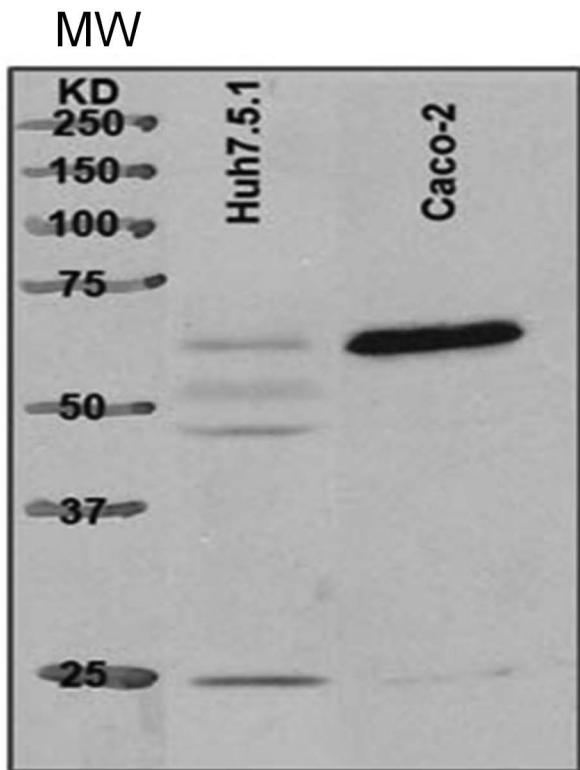

**Anti-OCLN (Zymed pAB,  
recognizes C-terminus)**

## Supplementary Fig 2

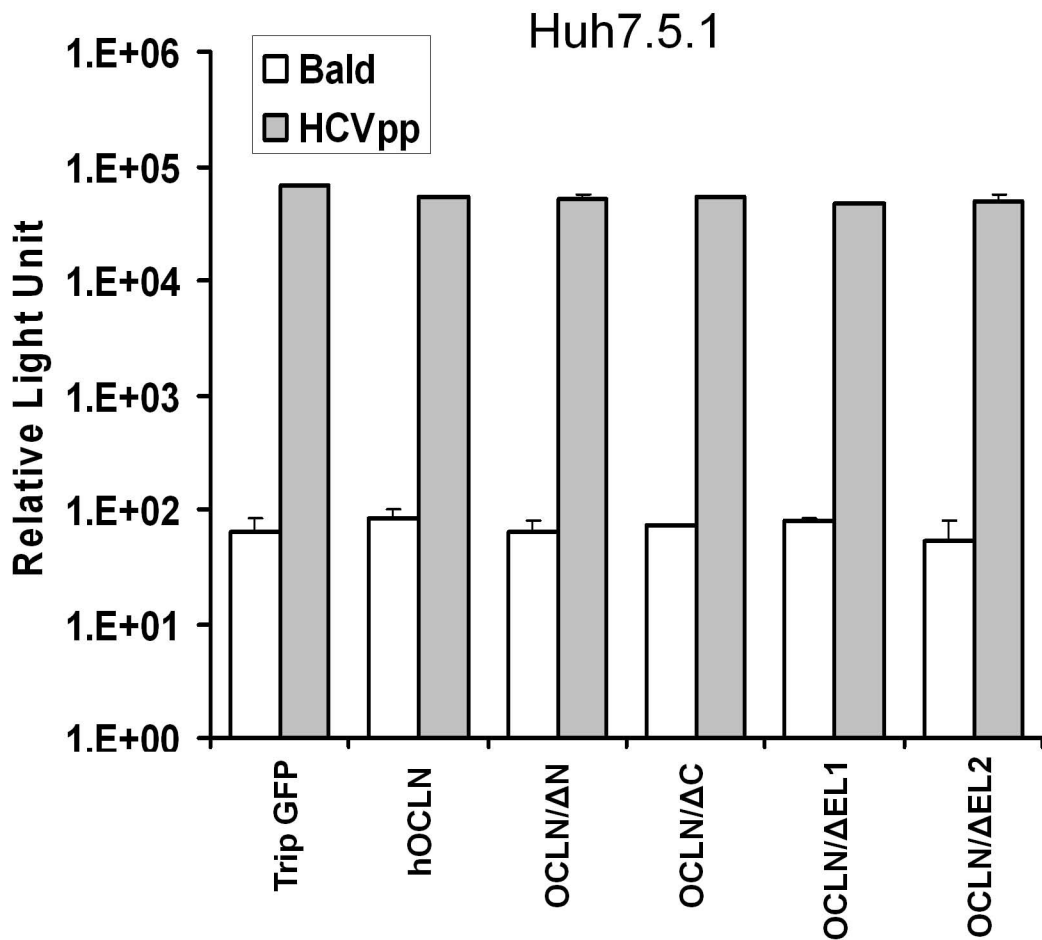

# Supplementary Fig. 3

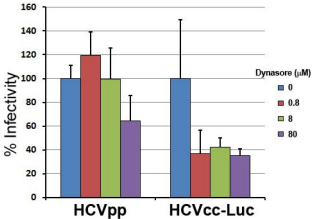

## Supplementary Fig. 4

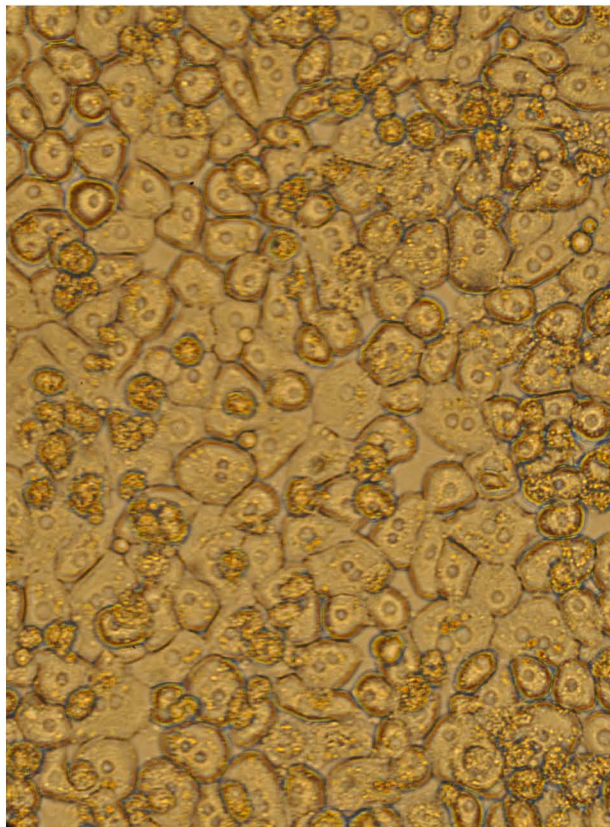

**Focal plane #1**

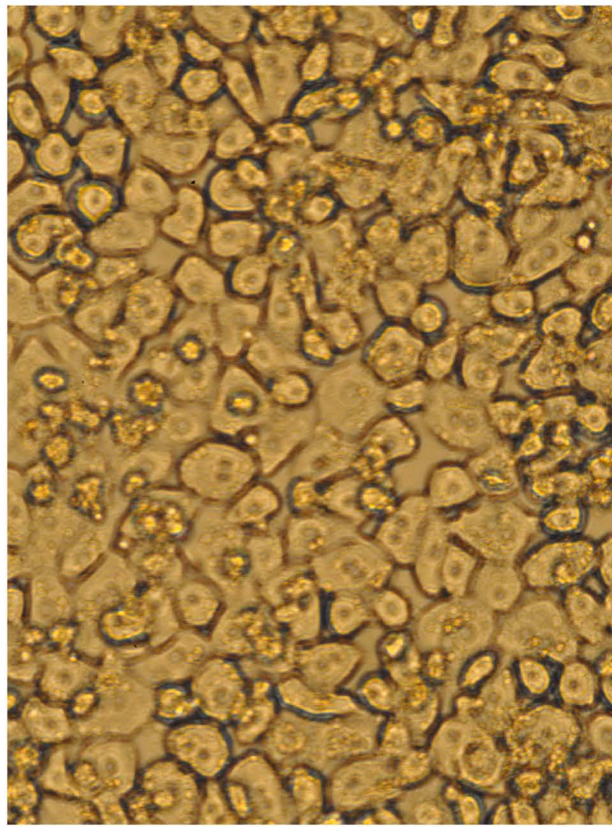

**Focal plane #2**

## Supplementary Fig. 5

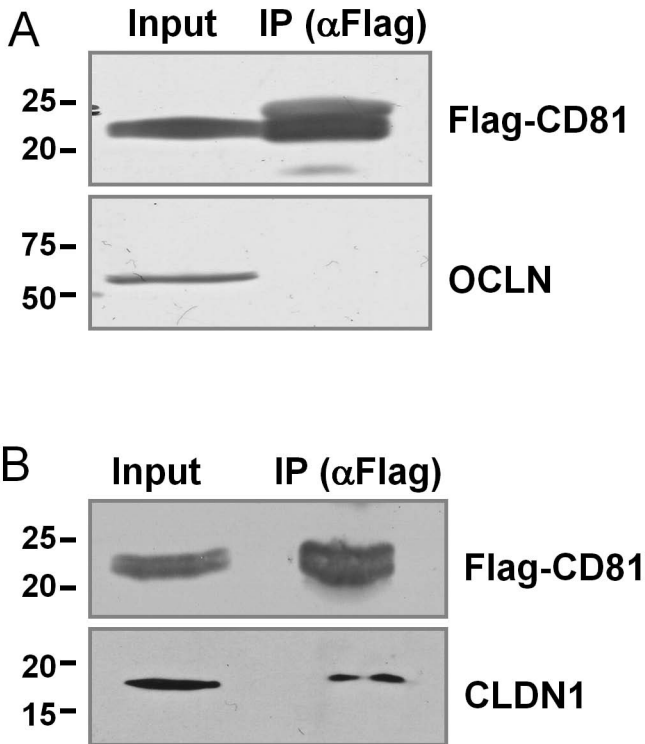

# Supplementary Fig. 6

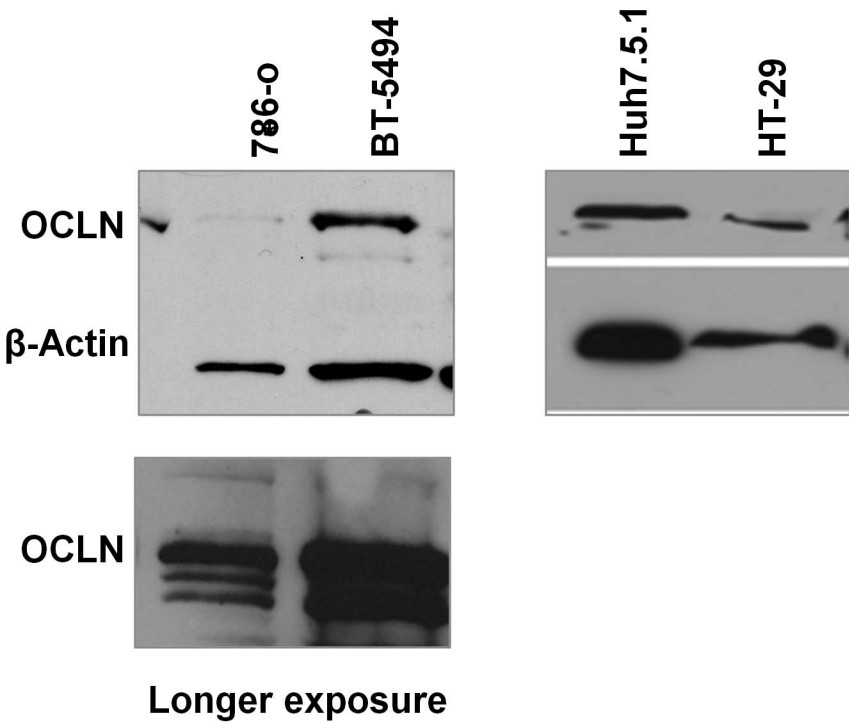

Supplement: NIHMS231454-supplement-01.pdf [file NIHMS231454-supplement-01.pdf]
